# Supplementary material
Source: Springer Nature journal article supplement (https://www.springermedizin.de/resource/supplementary/12885_2010_2438_MOESM5_ESM.pdf/9461308)

**A**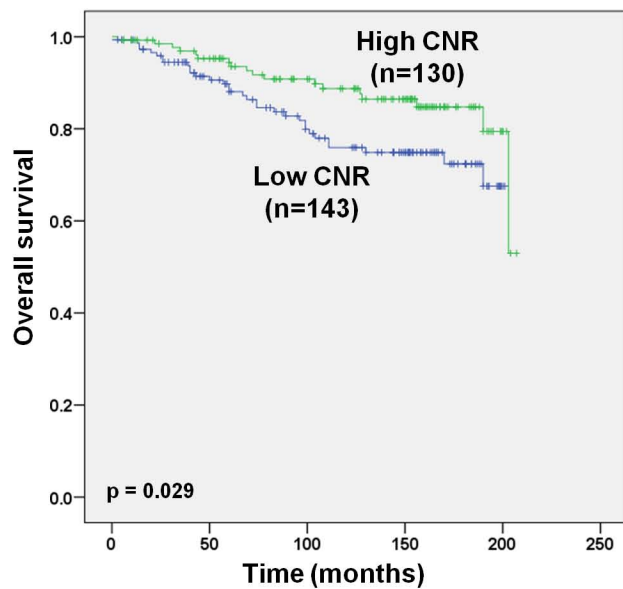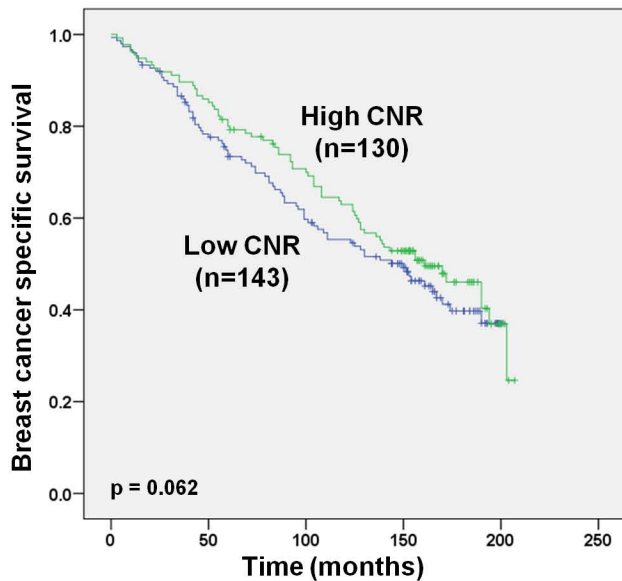**B**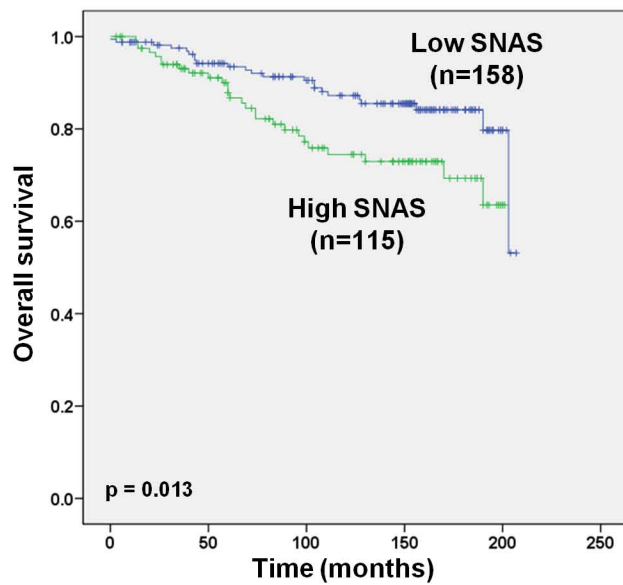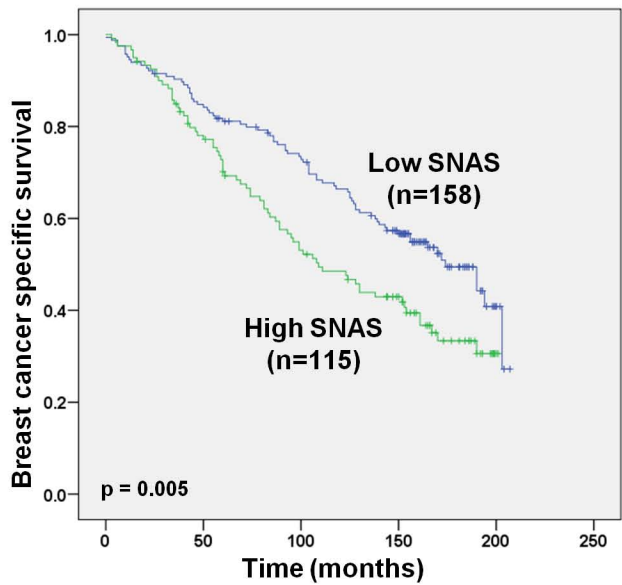

Supplement: MOESM5 [file 9461308]
